# Supplementary material
Source: PubMed Central journal article supplement (PMC5795393)
Supplement: supp_RA117.000434_133463_0_supp_17007_9yjdpv.pdf [file supp_RA117.000434_133463_0_supp_17007_9yjdpv.pdf]

Figure S4

```

TBSR1  KEVSASKEKSNKKKMLITGLAAGGVAAAAVVAAAI I-----HEATKAPKDFVFNEENGEFMEVDGDACQD-ADNPIYDENG----ADDPFANE 88
TBSR2  AQVGSQKSKTKNKKKMI I SAAAGGVAAVAVAAAVLI-----HEAIKPPKDFVFNDENGEFVEVDGNGAMENAENPIYDENG----ADDPFADE 89
TBSR3  AGVSSKKKADADKKKIYIGAGIAGVVAIAAAA IA-----YEASKKAKDFNEEDVEGWDNGYDNAMQEN--DNPLYNEDA----NDDPFADE 87
TBSR4  QGDANKSNSKKKDKYLIT SIAAAA VAAAAITAAILIA-----KEASKKANDFGFNPEEALQANNDFVQEK-ENPVYNENA----QDDPFANE 90
TBSR5  ESGGGKSNKKKNLYLIIIGVAAGIVALAAAIAGIIIA-----KEAAKHAAEFDFPEKGEFIEDPGVSQEN--DNPIYDENA----NDDPFKND 89
TBSR6  VNADSETTTKKNIGMLIAIVASILAI IIALVIGIVLYTRHMKQEESEEESSIEMQETVISSVVNPNEGITL-----DNPLFTTSMVDQ-EEDI FAGE 97
TBSR7  PKSRGGKTNPGKTAGIVIGVIIAILVVAII IITII L-----MKRKKDNGSANDDTNNSIDMMNEETRRTVTGEEYAT--ADNPLFSTADVDA-GIDS DSPD 100
TBSR8  GGSANQKNNSSVMKGLYIGVGFVAALLVILVIVVI--FHKKKNAPPVPDQEDN KDSLEELETQVMSTQSTINPEEIATKDNPLFSREIT--HDEDPFED 104
TBSR9  NSK SANKKKKATNAGLIAGIVIVGLVVLVLLVLLVLLI-----KSGGNNADSDSETENEDLEESETQIATSI PMEEATRDNPLFSASEVA-NDNNPF SDE 102
TBSR10 NSK SANKKKKATNAGLIAGIVIVGLVVLVLLVLLVLLI-----KSGGNNADSDSETENEDLPESETQIATSI PMEEATRDNPLFSASEVA-NDN DPF SDE 102
TBSR11 SKKANTKKNNGNVGLIVGIVIGI ILLVLCVLAVILLI-----QRKKNSHPDSASDNSDIEERETQISTNISLEETA--TKDNPLFSSETIT-QNNDPF SDE 100
CTMD1  PAYQKQMDQKSRRNMI IAIAAACVGLIVVVILIIIFL-----KKRSTKEESDQSVLSMDSEQVGKYMNTSTTTAVTQ---ENPLWSSQLINYDGD DDPFKGD 99
CTMD2  AIEETPAPPKSNMTMYIIIGVVAGI ILLVAAALLIWFVV-----AKKKEDEESNSTVEMVEETVTIAPTTSNTIT-----NDNPLWTTSFV--GDD DPFKGD 95
BspA   KIIFDNPEIKSVSSLLILIIIAAIEVILICSMIILII-----KRNEEDSSTSAIELDVEKVEAANAETELILT-----NENPIFSMQ---MSDDPFAD 93
IBS7   LKVPQEKGADHTQAIVLGCVGGIVAVGLGLVLA RLSVEIYDRREYSRFEKQQQLNW K-----QDSNPLYKSAITTTINPRFQEAD 88
      [AGIP][YAL][IAFY][A][GSA][GAS][VGIA]                                NPXY                                [DE]D[PS]FA

```
