# Supplementary material
Source: PubMed Central journal article supplement (PMC5795393)

Fig. S1 A-G

Annotated, mass labeled spectra obtained from glycoproteins derived from  $\beta$ -amylase BA1

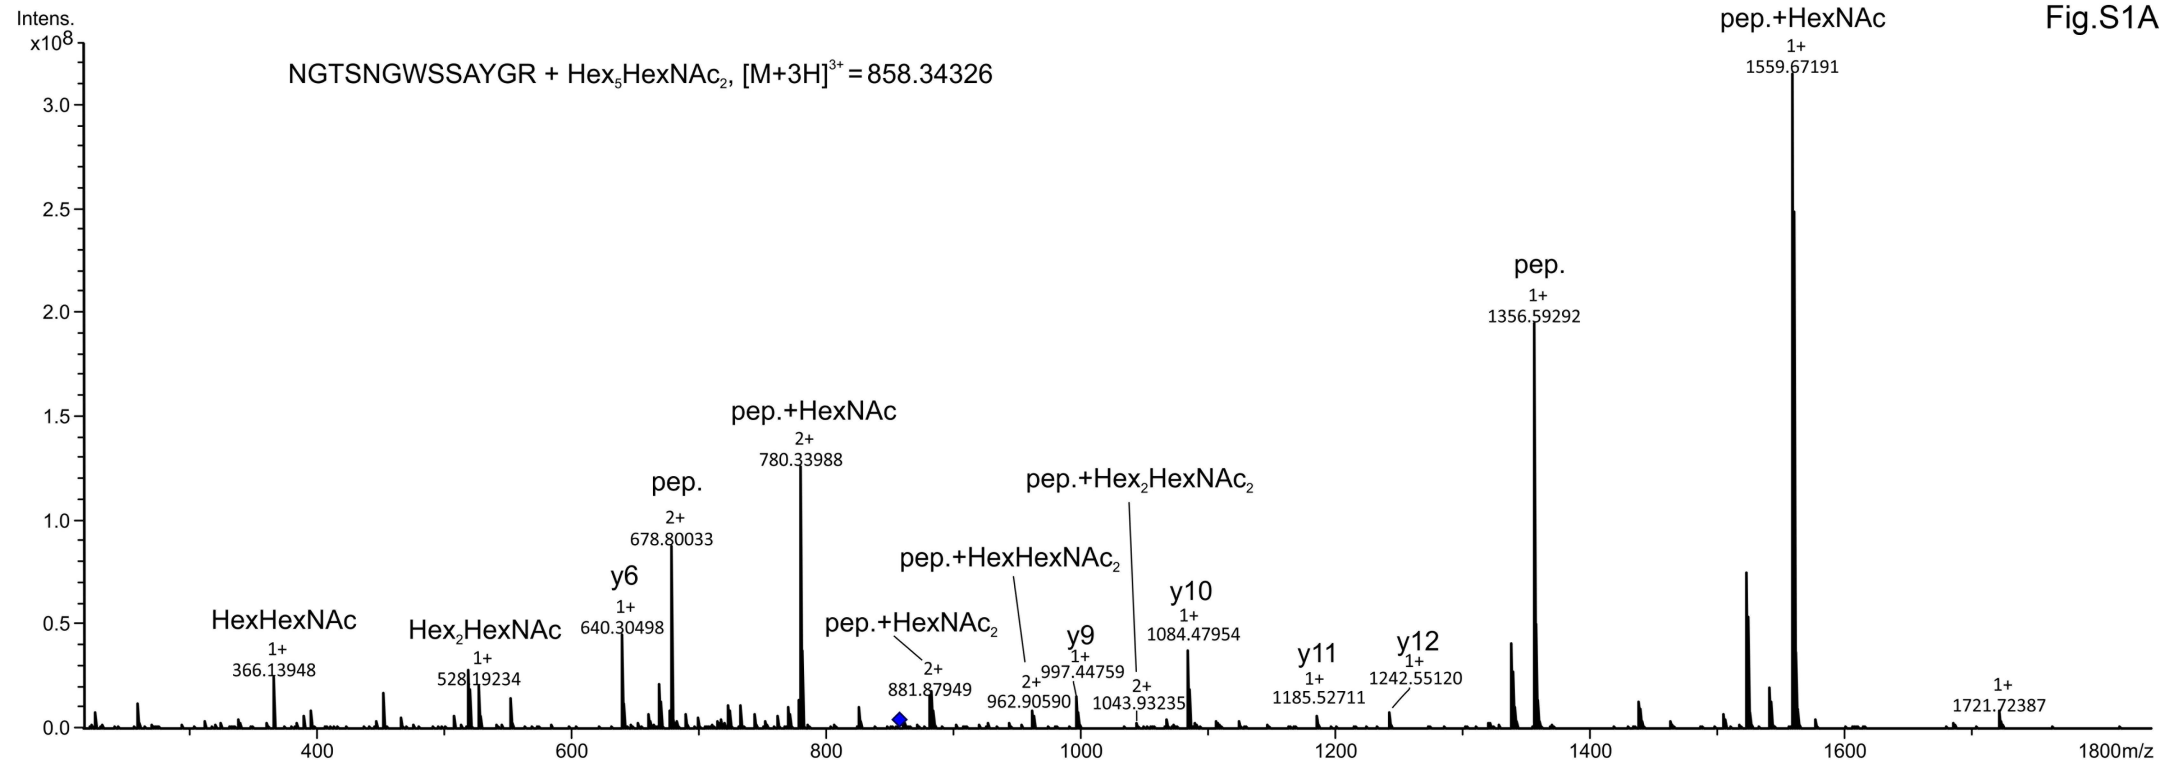

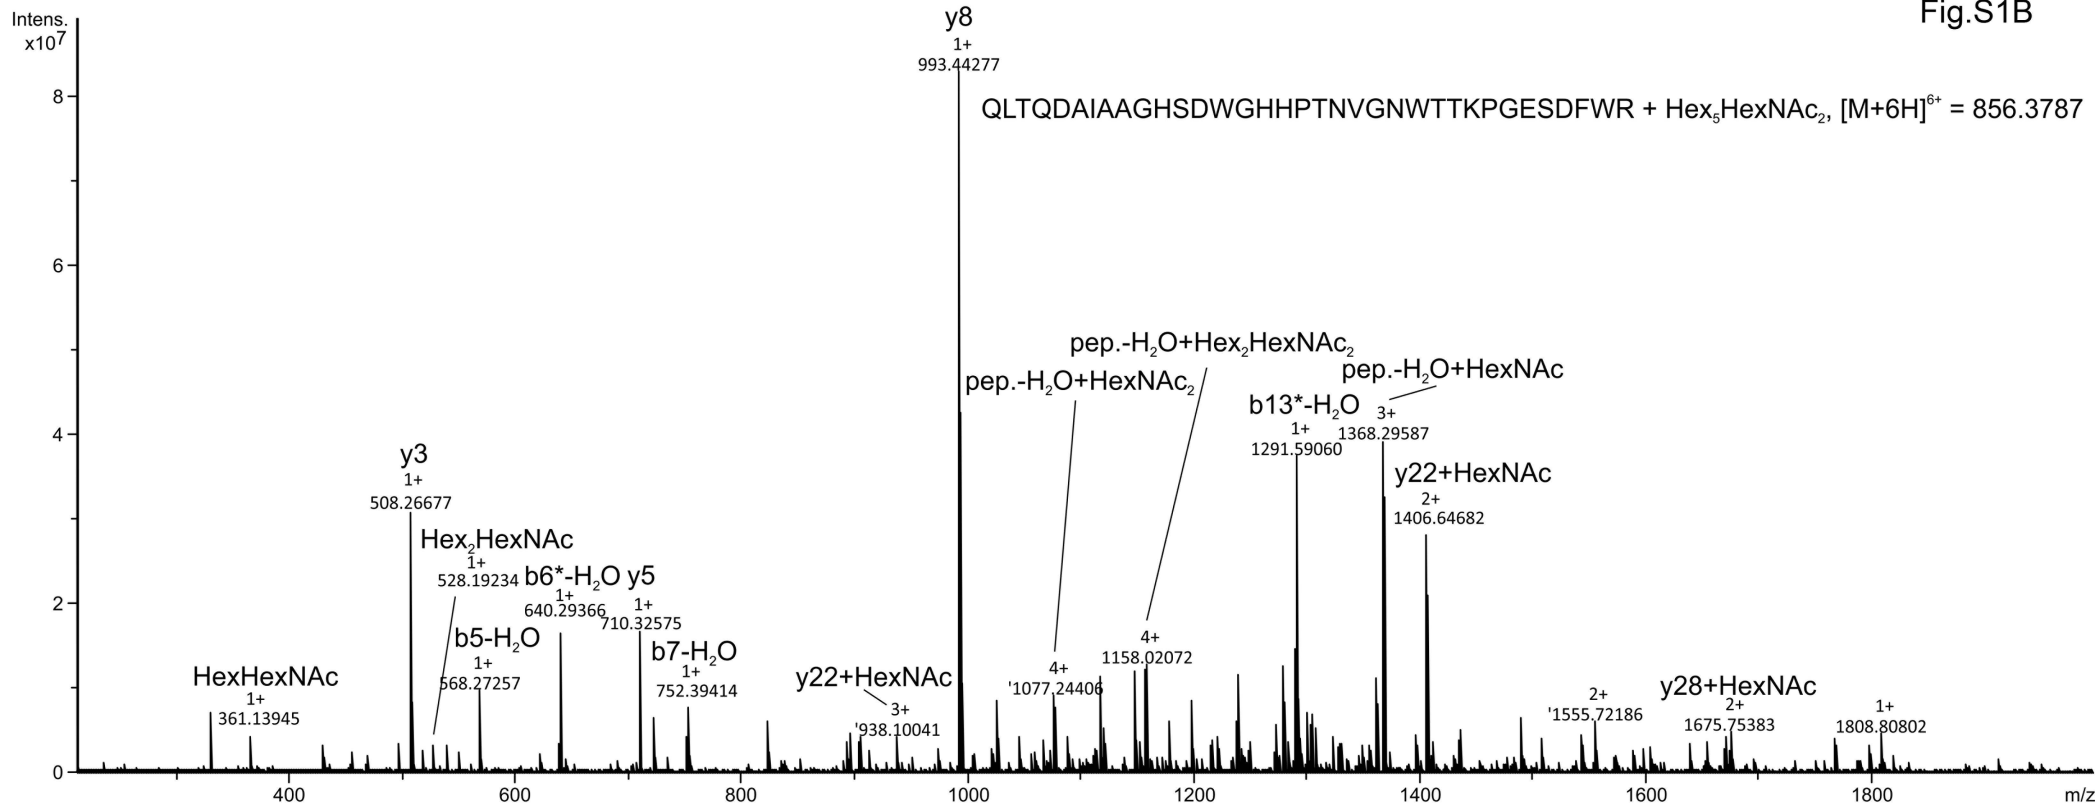

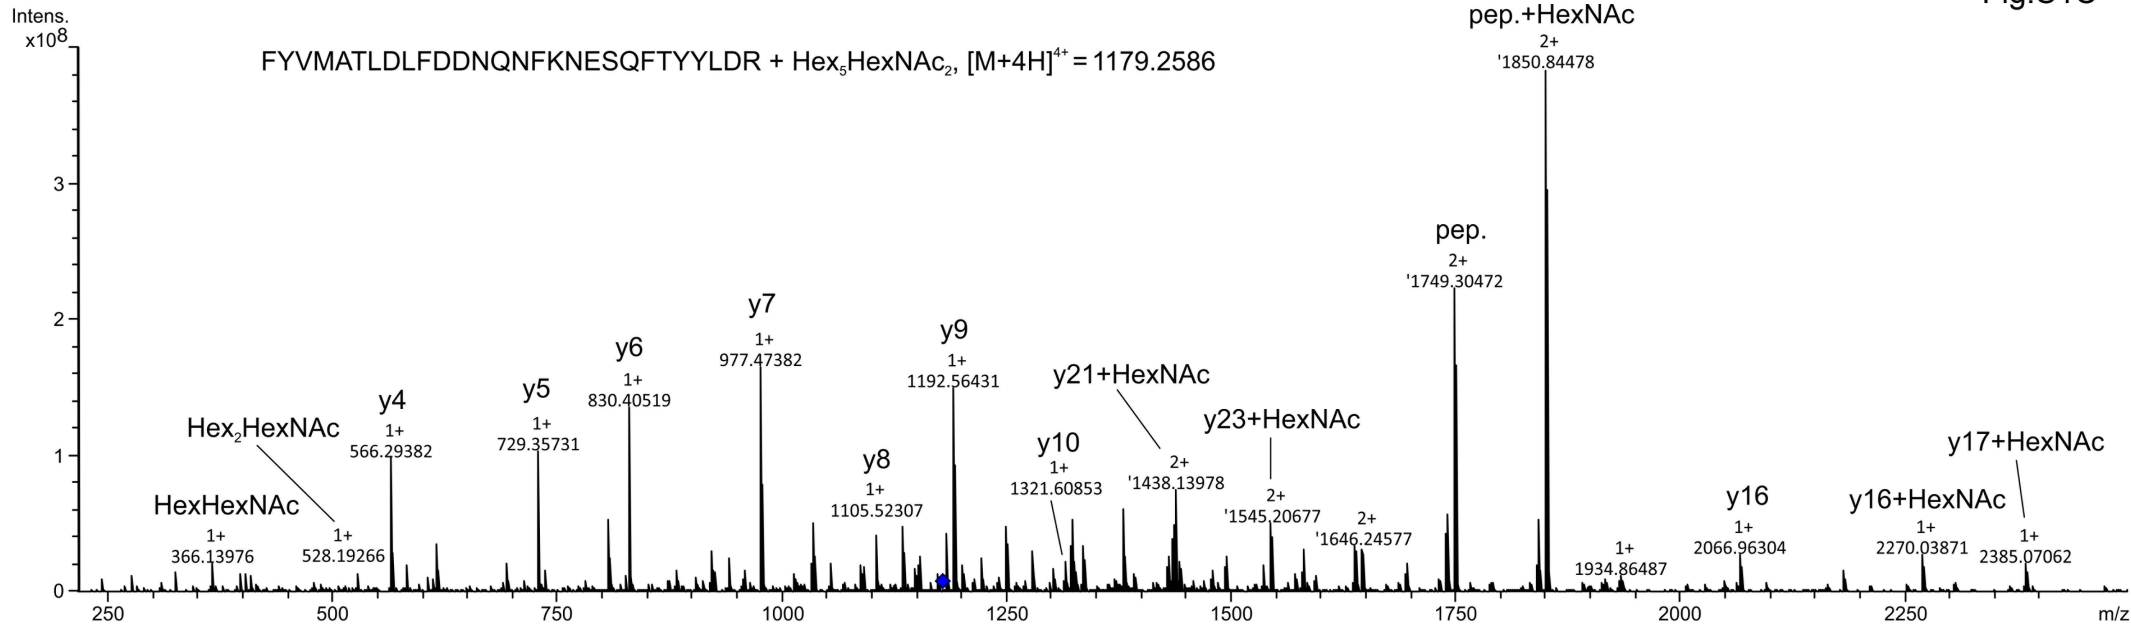

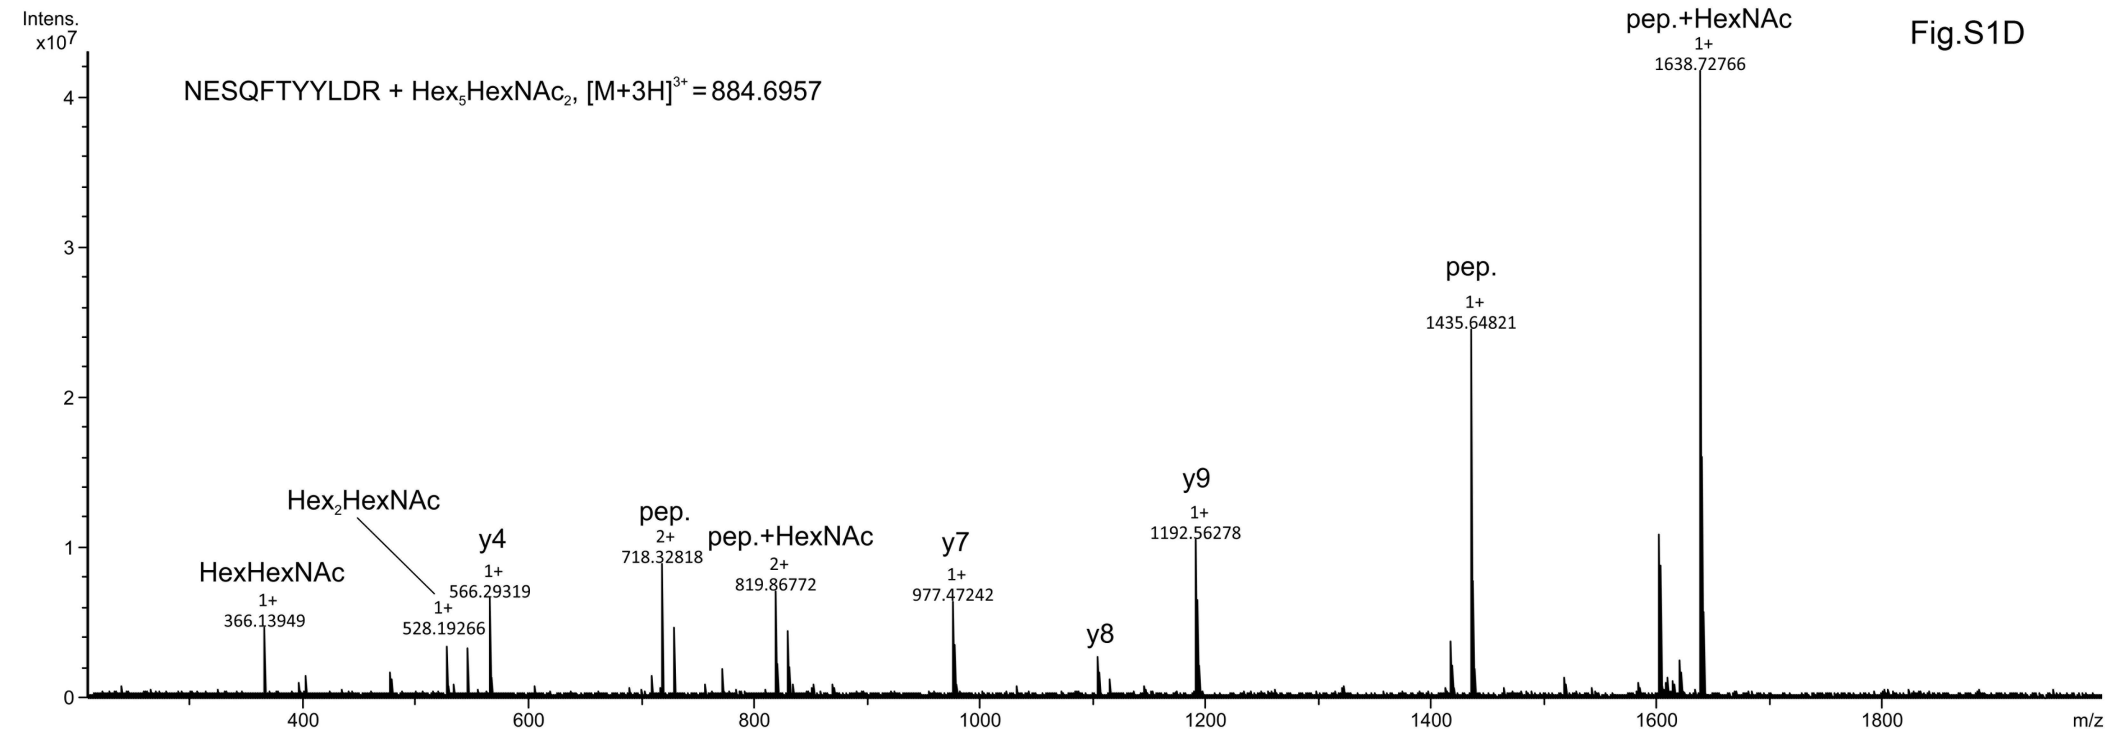

Fig.S1E

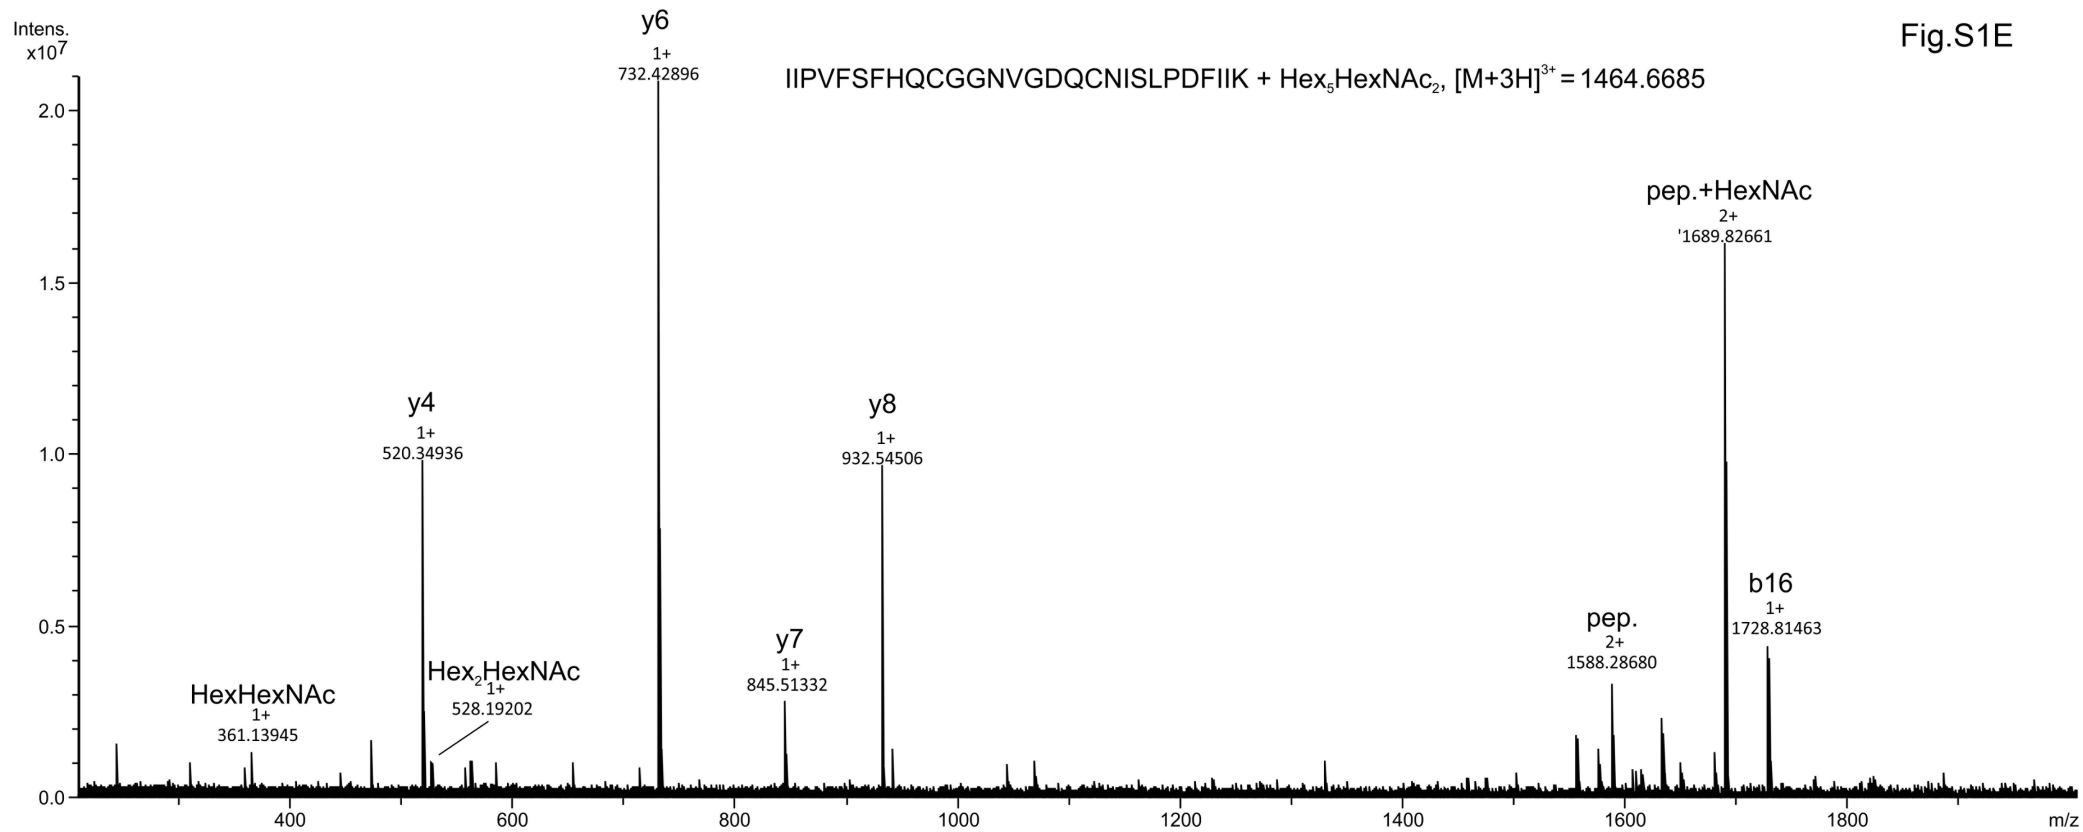

Fig.S1F

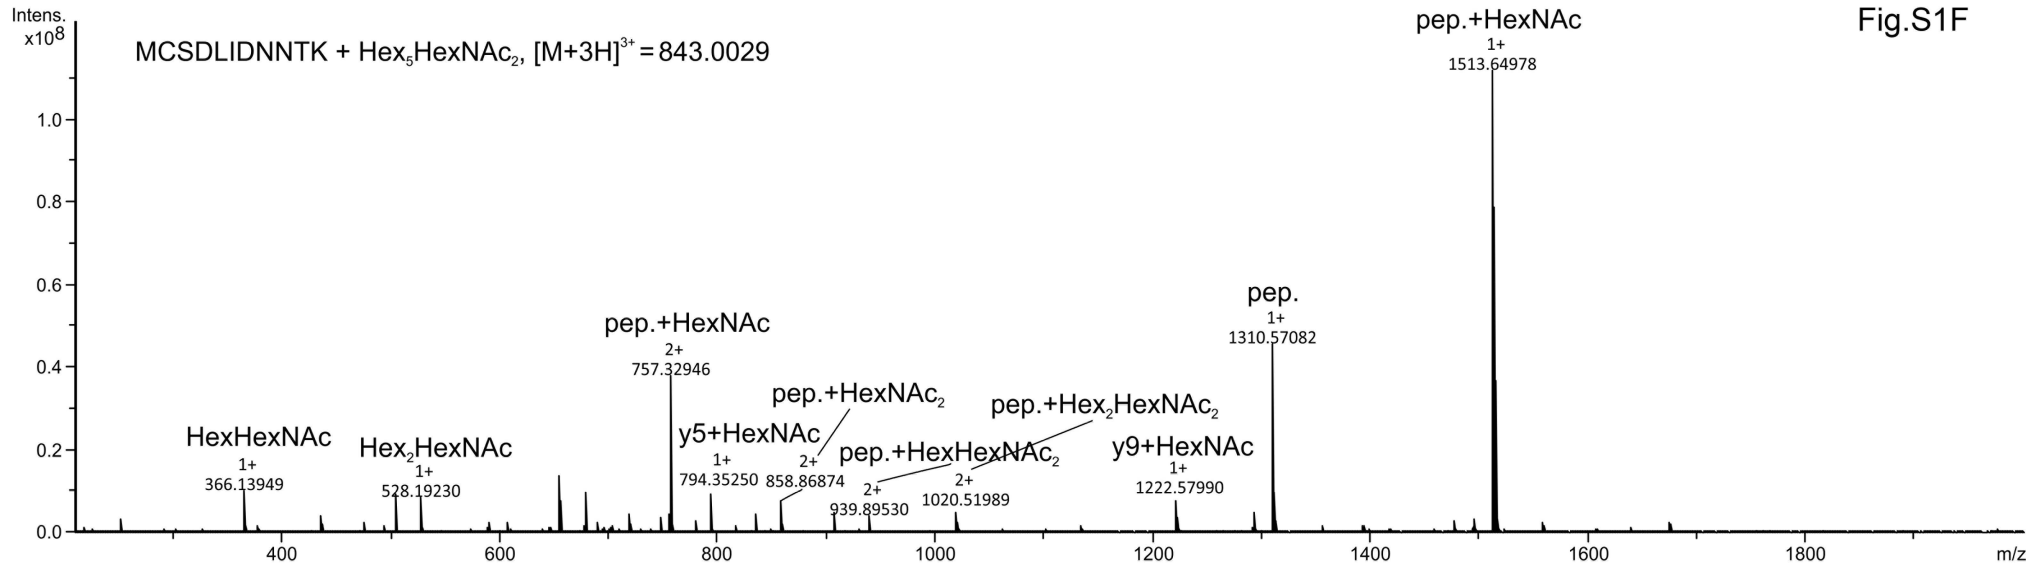

Fig.S1G

GNYSSNPPYLVQ<sup>+</sup>IND + 2x(Hex<sub>5</sub>HexNAc<sub>2</sub>), [M+4H]<sup>4+</sup> = 1089.4491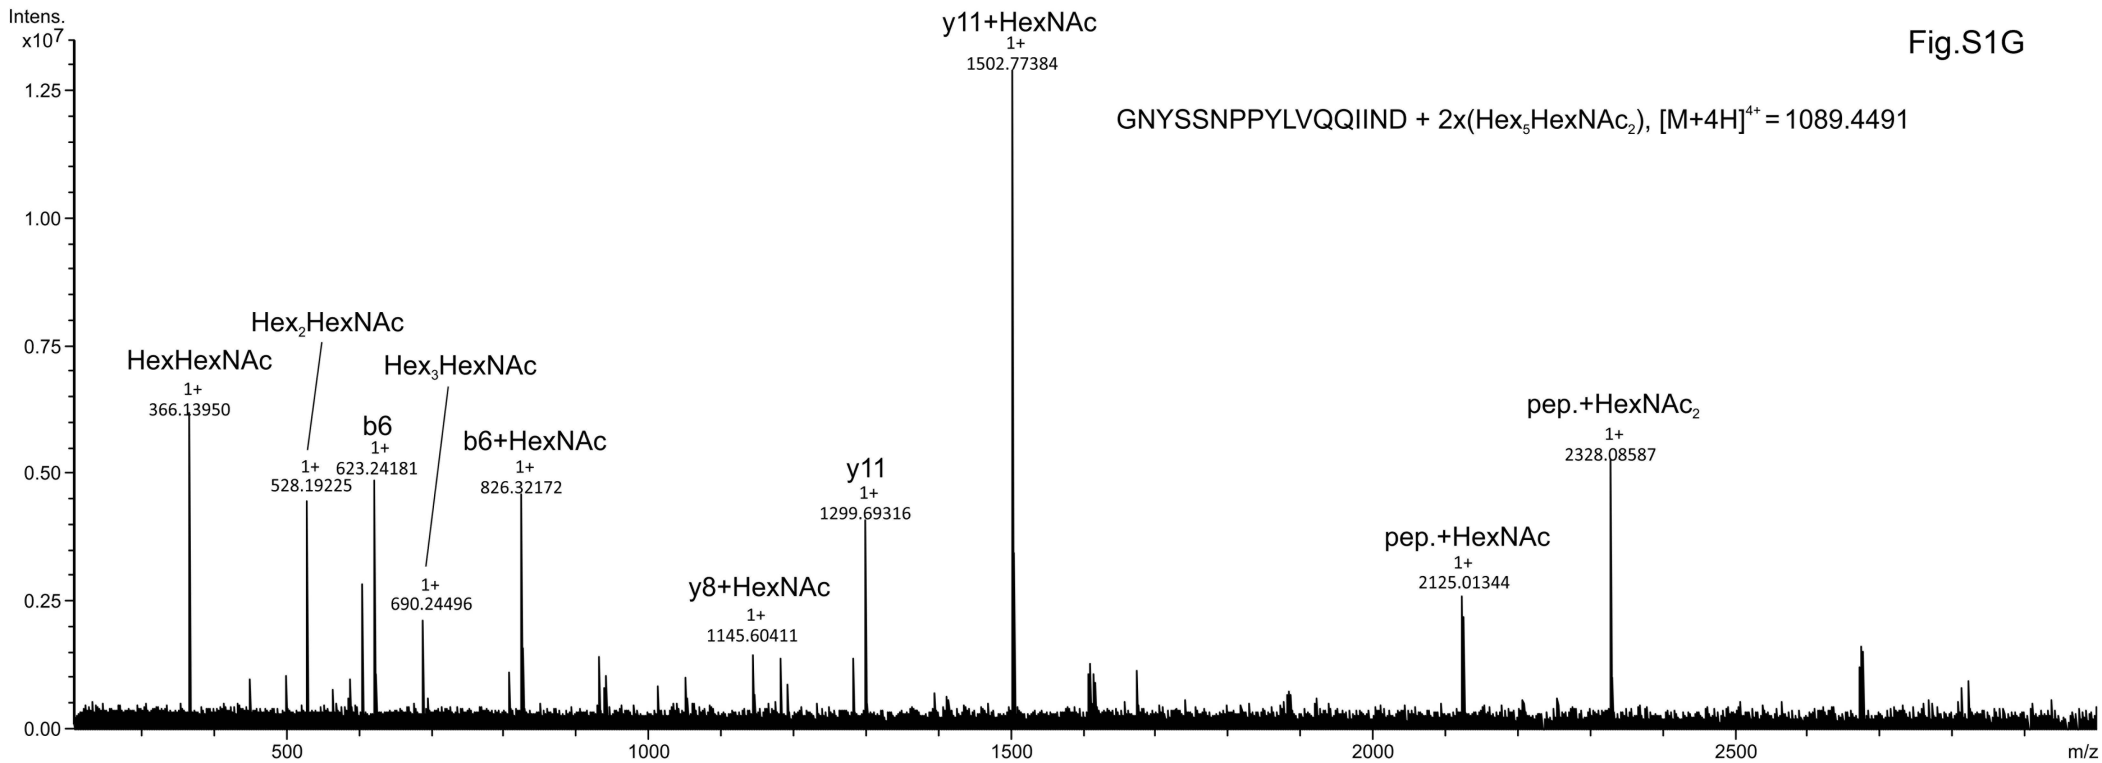

Supplement: supp_RA117.000434_133463_0_supp_17010_lyjdpl.pdf [file supp_RA117.000434_133463_0_supp_17010_lyjdpl.pdf]
