# Supplementary material
Source: PubMed Central journal article supplement (PMC5795393)

Figure S7

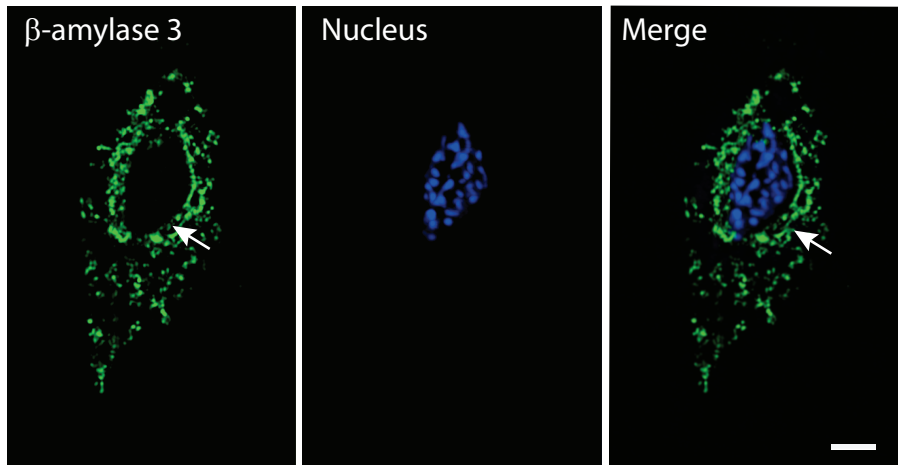

Supplement: supp_RA117.000434_133463_0_supp_17004_nyjdpv.pdf [file supp_RA117.000434_133463_0_supp_17004_nyjdpv.pdf]

Fig. S3

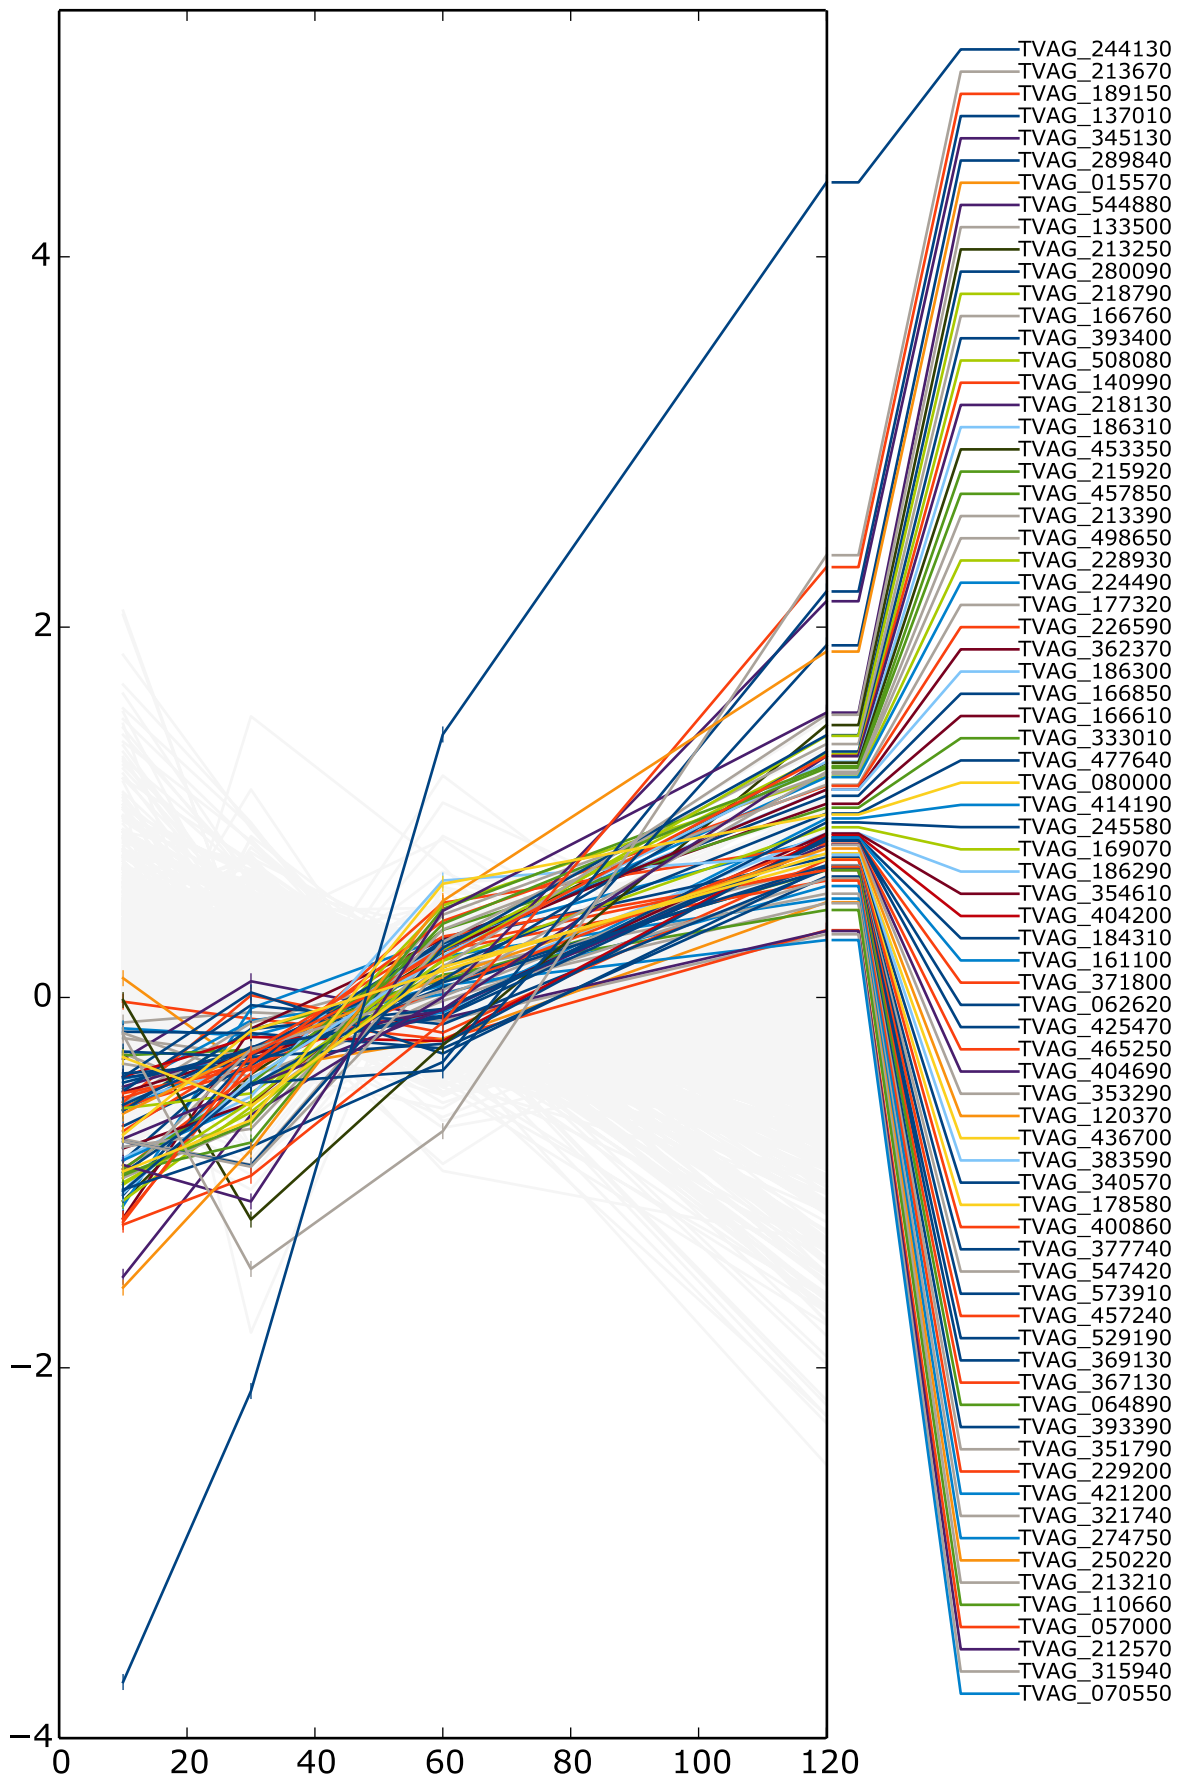

Supplement: supp_RA117.000434_133463_0_supp_17006_zyjdpv.pdf [file supp_RA117.000434_133463_0_supp_17006_zyjdpv.pdf]

# β-amylase phylogeny

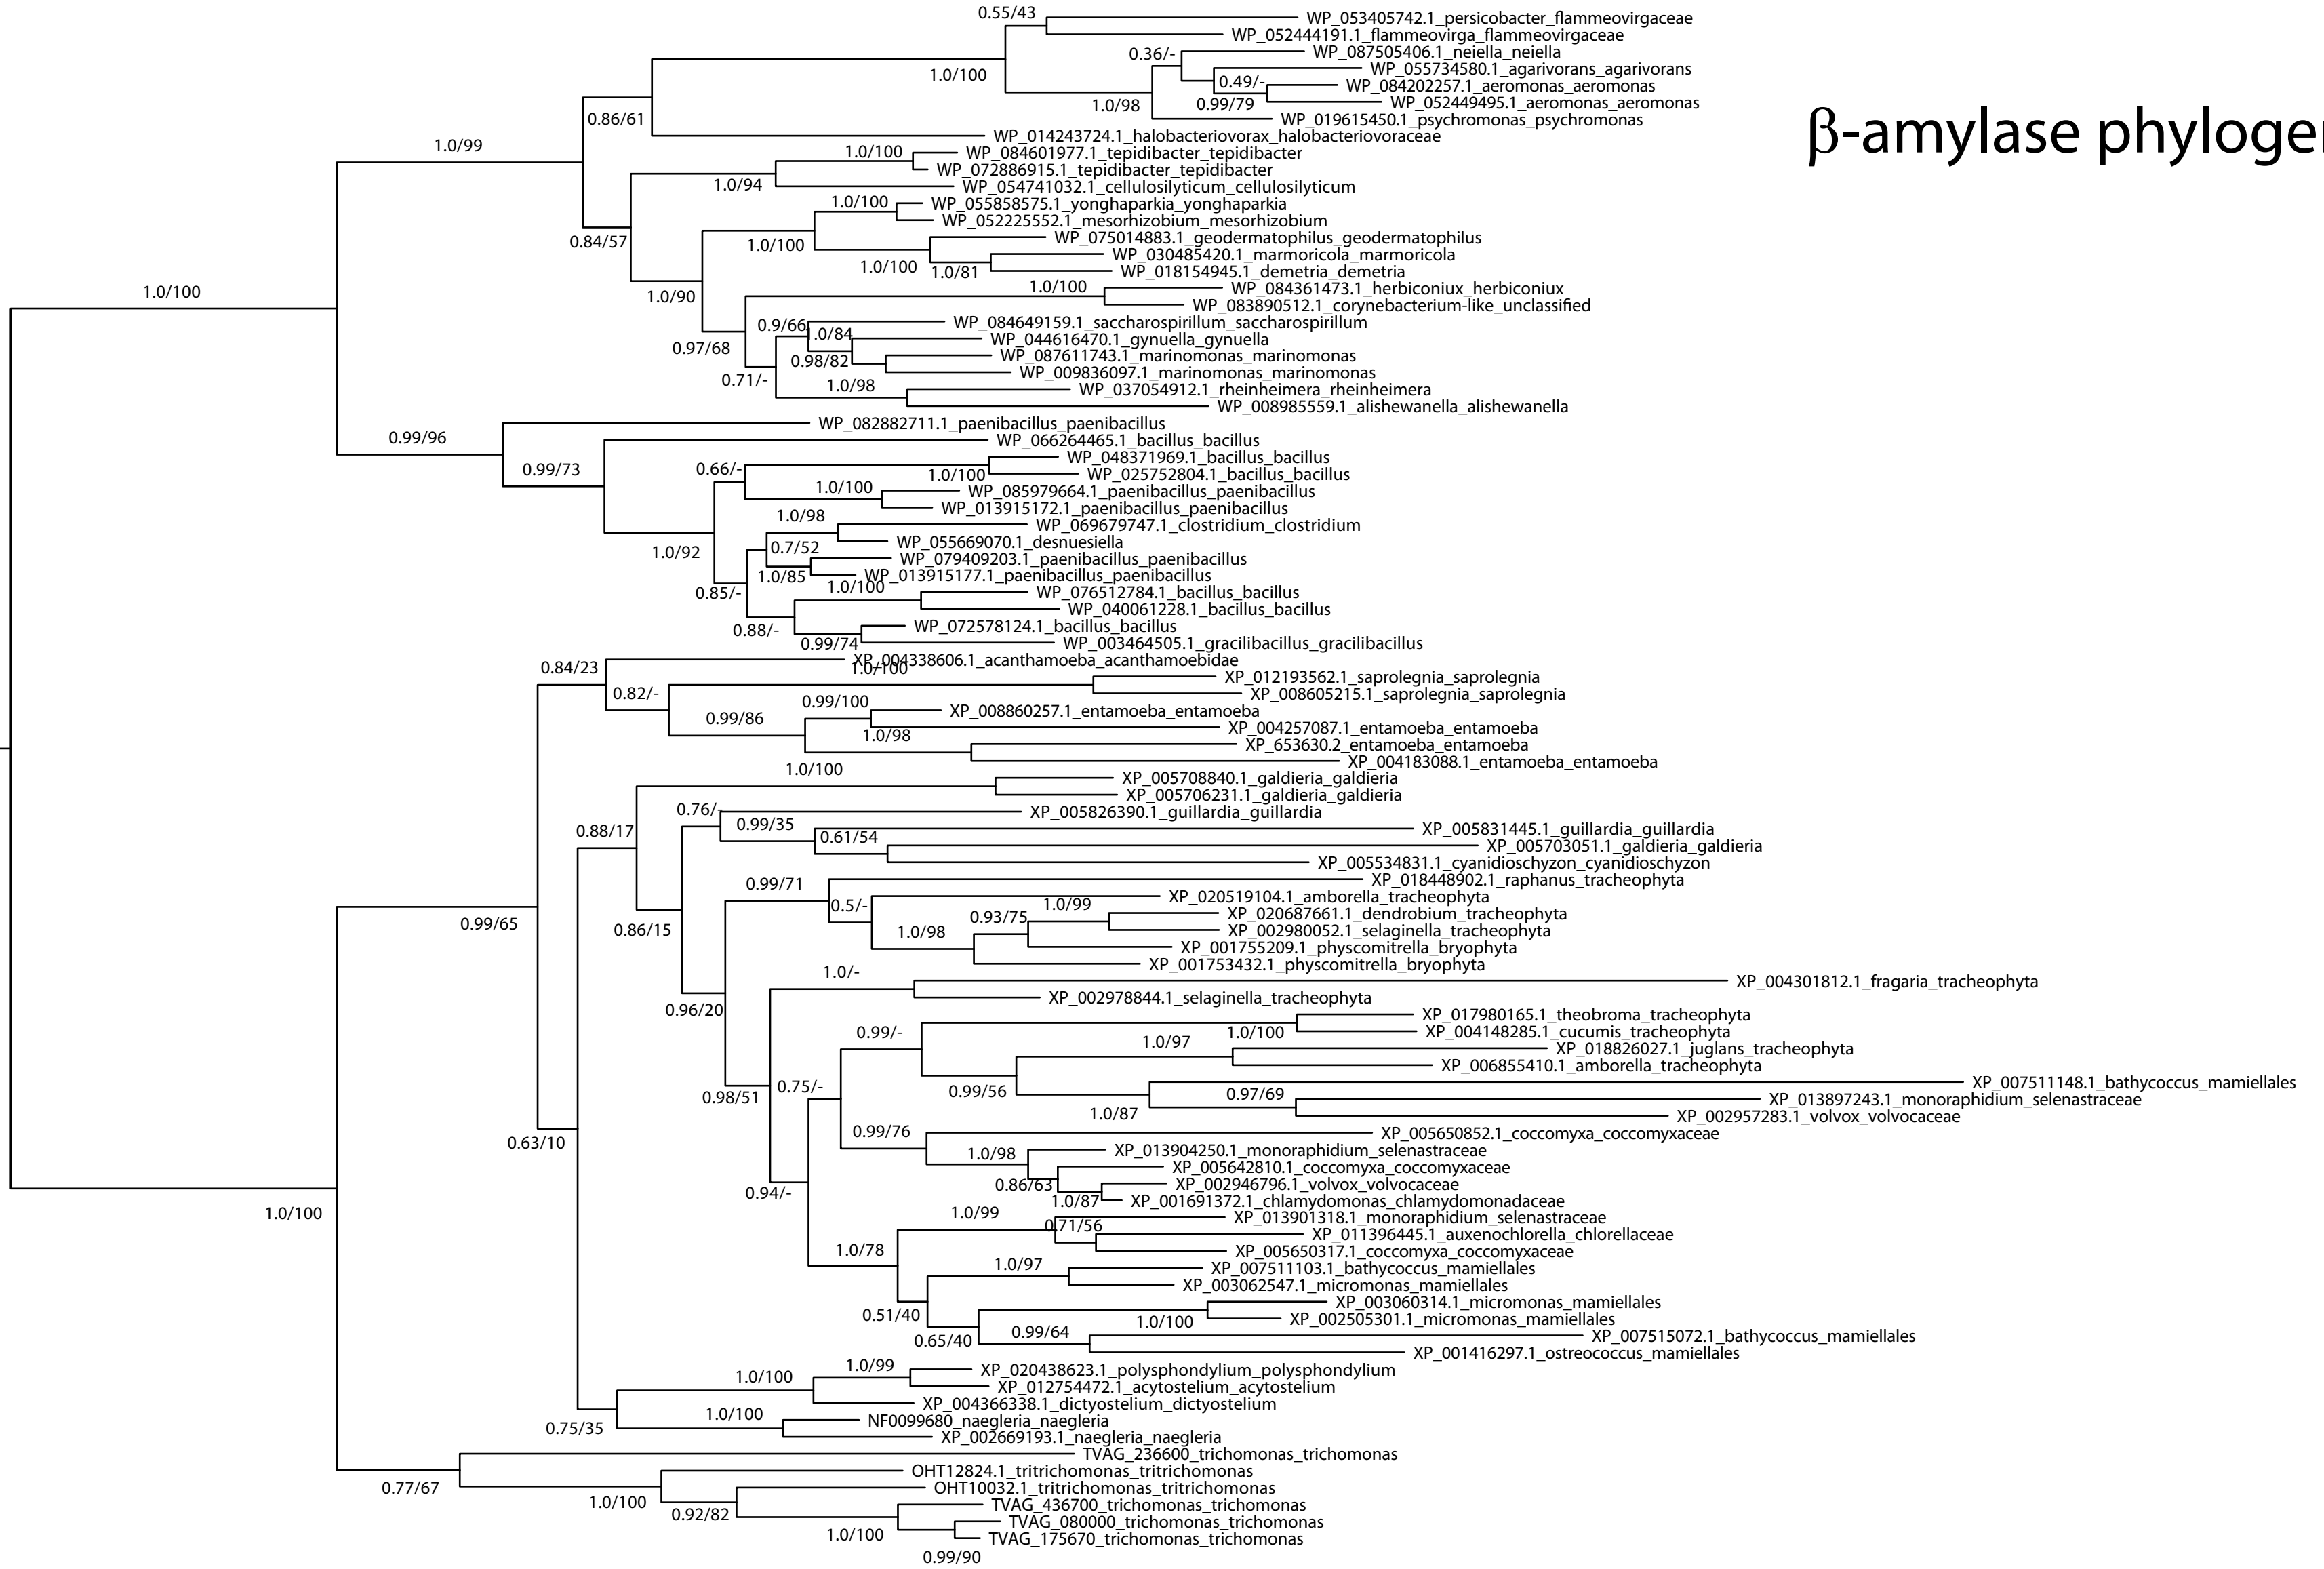

0.4

Supplement: supp_RA117.000434_133463_0_supp_17011_1yjdpv.pdf [file supp_RA117.000434_133463_0_supp_17011_1yjdpv.pdf]

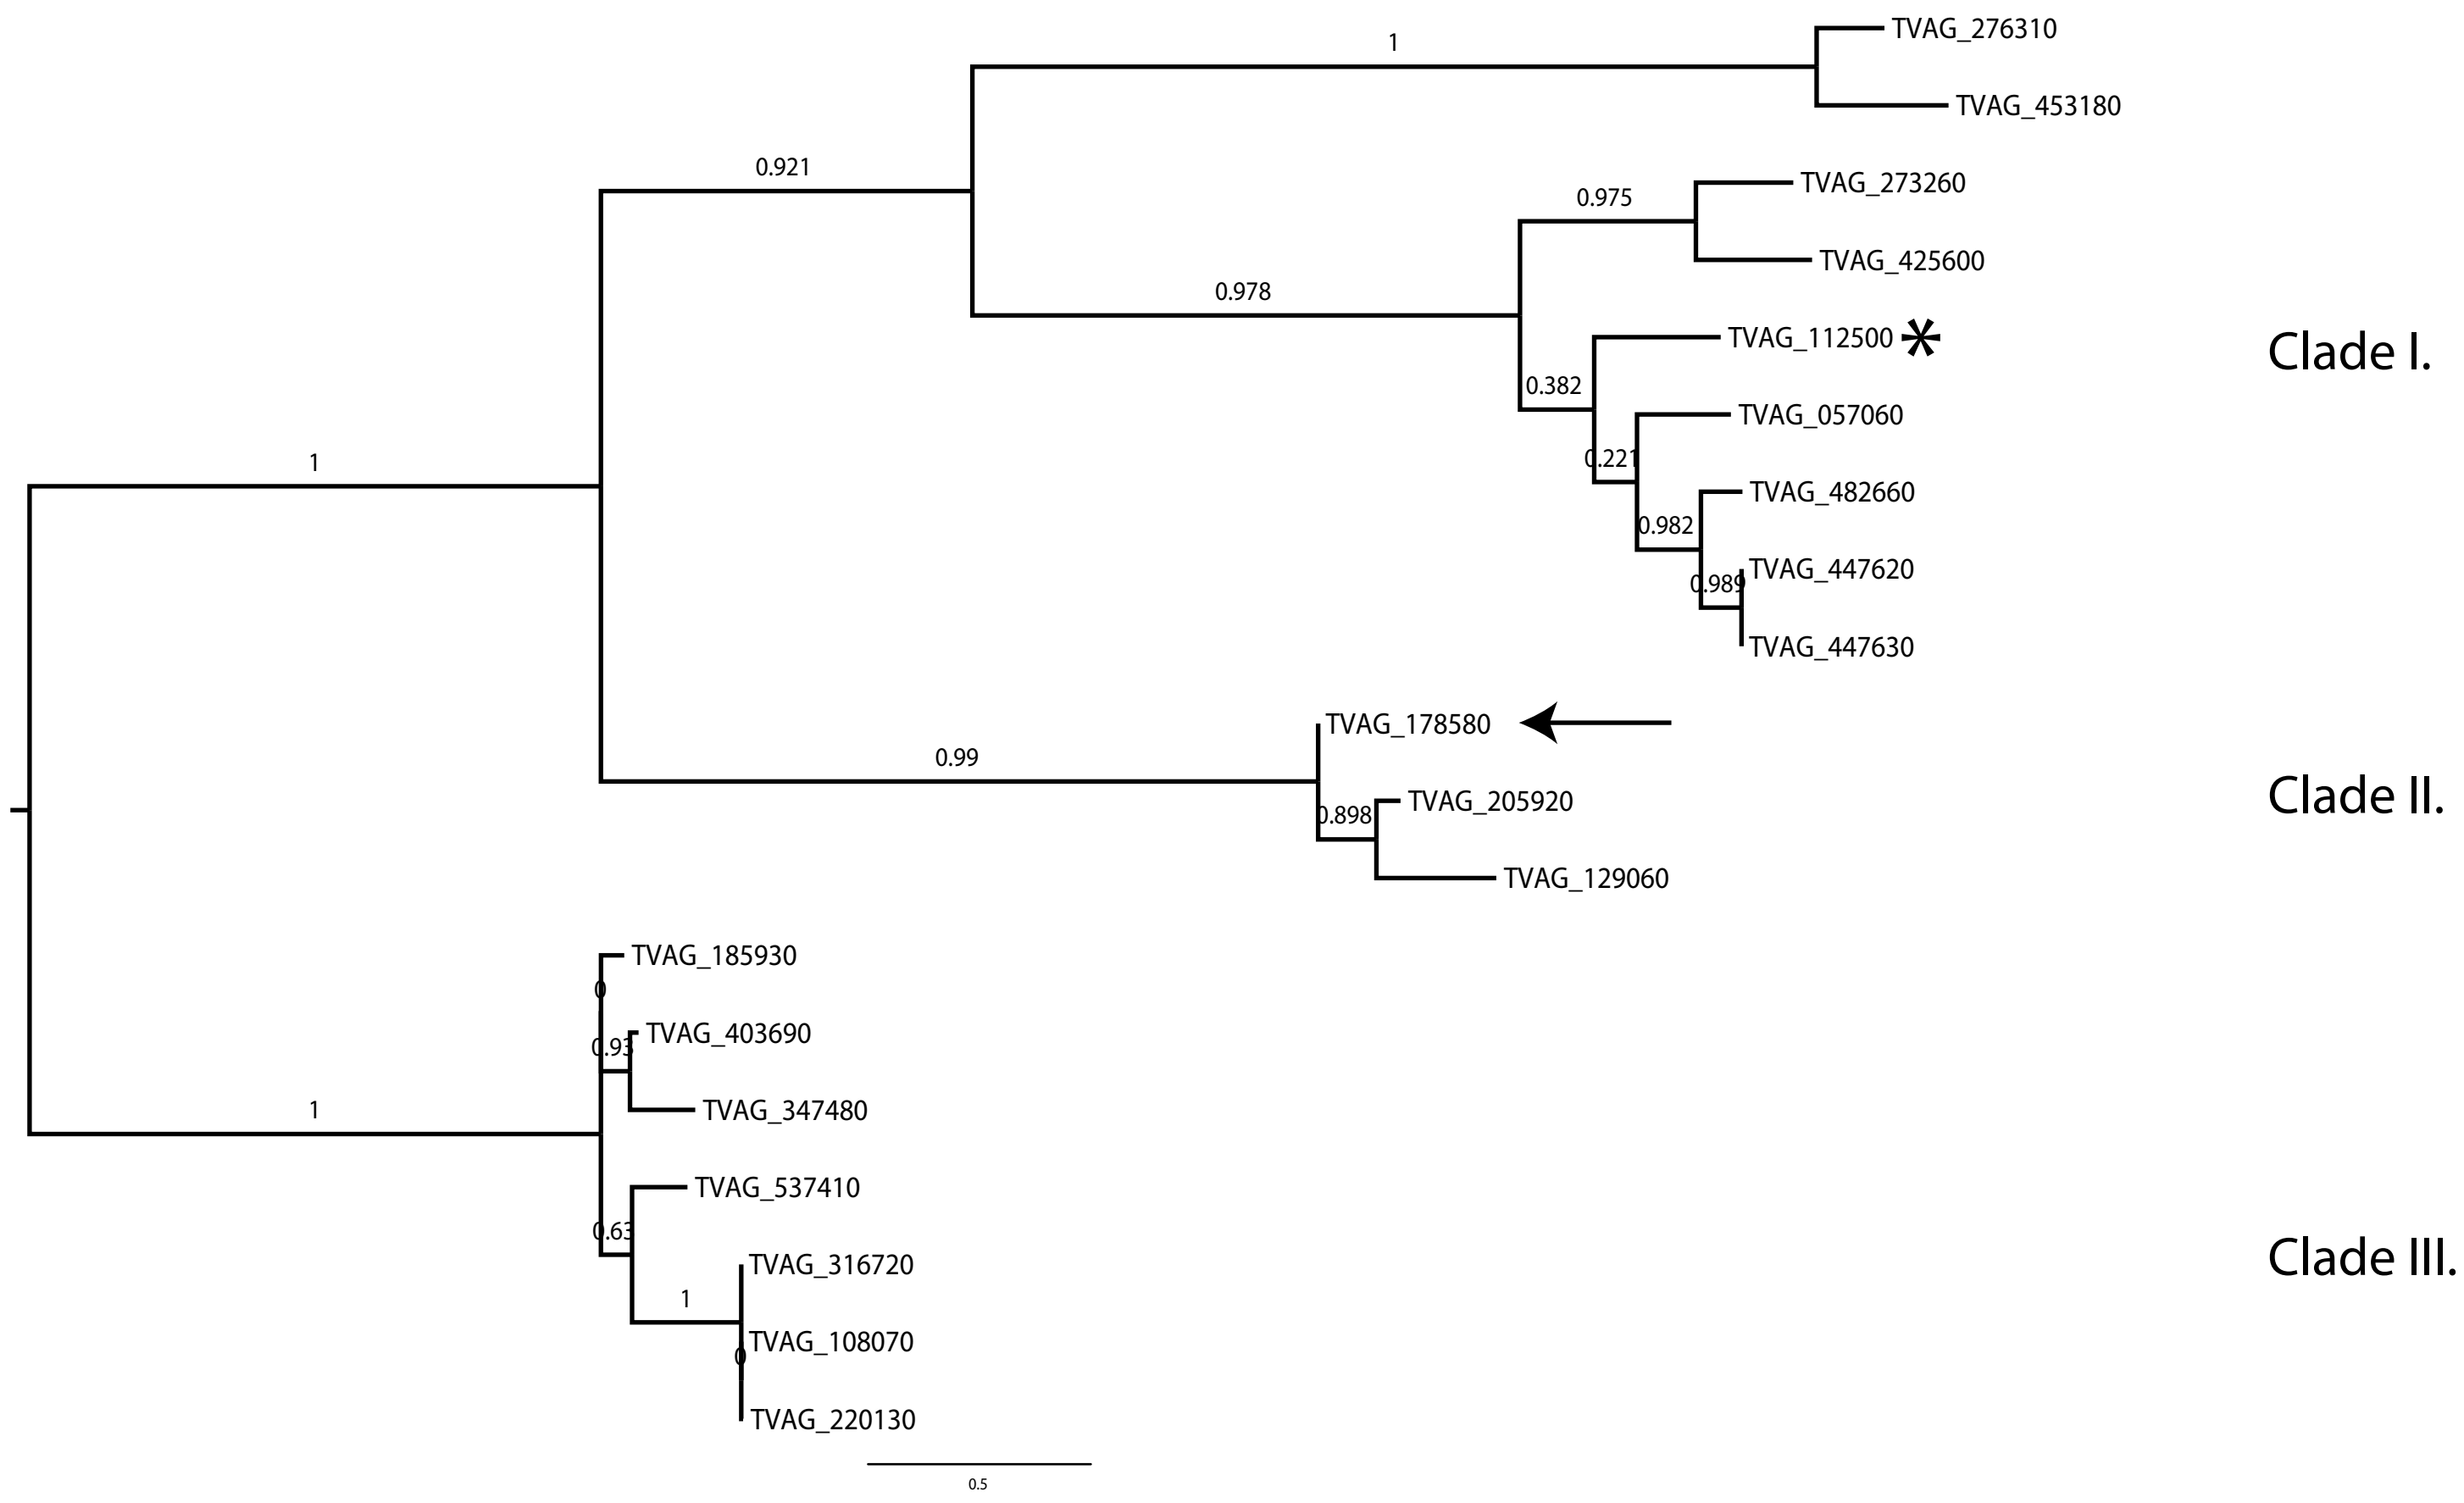

Supplement: supp_RA117.000434_133463_0_supp_17012_1yjdpv.pdf [file supp_RA117.000434_133463_0_supp_17012_1yjdpv.pdf]

Fig. S2

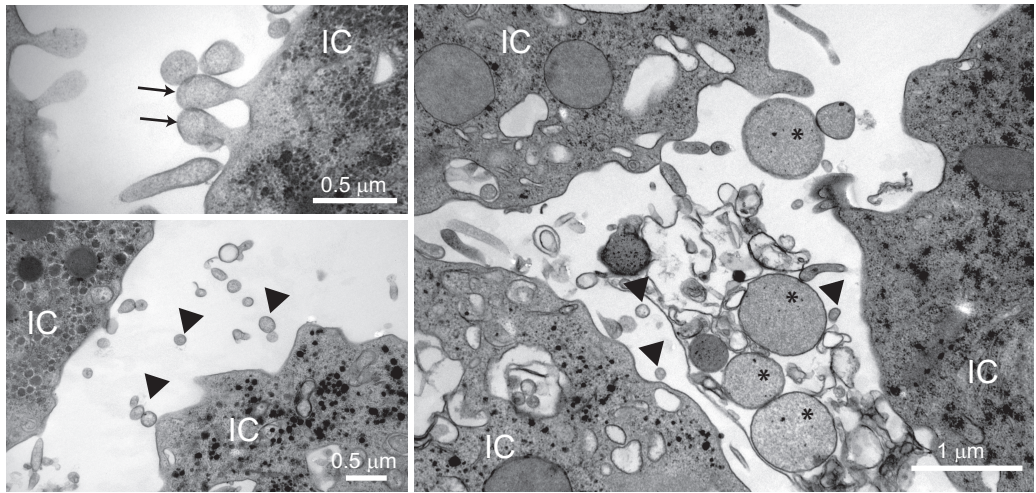

Supplement: supp_RA117.000434_133463_0_supp_17013_9yjdp9.pdf [file supp_RA117.000434_133463_0_supp_17013_9yjdp9.pdf]
